# Supplementary material for: Radio Tracking Reveals the Home Range and Activity Patterns of Nutria (Myocastor coypus) in the Macdo Wetland in South Korea
Source: MDPI journal article supplement (doi:10.3390/ani13101716), 2023-05-22
Supplement: s1 [file s1]

Table S1

| Nutria ID | Sex    | Body Mass<br>(kg) | Head–Body Length<br>(mm) | No. Locations |
|-----------|--------|-------------------|--------------------------|---------------|
| N1        | Female | 6.12              | 570                      | 114           |
| N2        | Female | 3.13              | 470                      | 115           |
| N3        | Male   | 4.25              | 530                      | 143           |
| N4        | Male   | 3.35              | 480                      | 113           |
| N5        | Male   | 3.73              | 460                      | 41            |
| N6        | Male   | 4.33              | 515                      | 111           |
| N7        | Male   | 6.55              | 625                      | 61            |
| N8        | Female | 4.35              | 545                      | 54            |
| N9        | Male   | 5.18              | 575                      | 31            |
| N10       | Female | 4.79              | 565                      | 184           |
| N11       | Female | 4.04              | 528                      | 70            |
| N12       | Male   | 5.36              | 580                      | 33            |
| N13       | Female | 3.84              | 480                      | 12            |
| N14       | Female | 5.27              | 610                      | 52            |
| N15       | Male   | 5.15              | 570                      | 155           |
| N16       | Female | 5.51              | 580                      | 188           |
| N17       | Male   | 4.22              | 525                      | 120           |
| N18       | Male   | 4.74              | 530                      | 0             |
| N19       | Female | 5.25              | 580                      | 195           |
| N20       | Female | 4.31              | 539                      | 86            |
| N21       | Male   | 5.39              | 585                      | 85            |
| N22       | Female | 5.30              | 596                      | 84            |
| N23       | Female | 5.20              | 605                      | 117           |
| N24       | Male   | 5.71              | 625                      | 143           |
